# Supplementary material for: A 3D hierarchical network derived from 2D Fe-doped NiSe nanosheets/carbon nanotubes with enhanced OER performance for overall water splitting
Source: Royal Society of Chemistry journal article supplement (doi:10.1039/d1ta07393a), 2021-12-30
Supplement: d1ta07393a1.pdf [file d1ta07393a1.pdf]

## Supporting Information

### 3D Hierarchical Network Derived from 2D Fe-doped NiSe Nanosheets/Carbon Nanotubes with Enhanced OER Performance for Overall Water Splitting

*Kai Chang<sup>1</sup>, Duy Thanh Tran<sup>1</sup>, Jingqiang Wang<sup>1</sup>, Nam Hoon Kim<sup>1</sup>, Joong Hee Lee<sup>1,2\*</sup>*

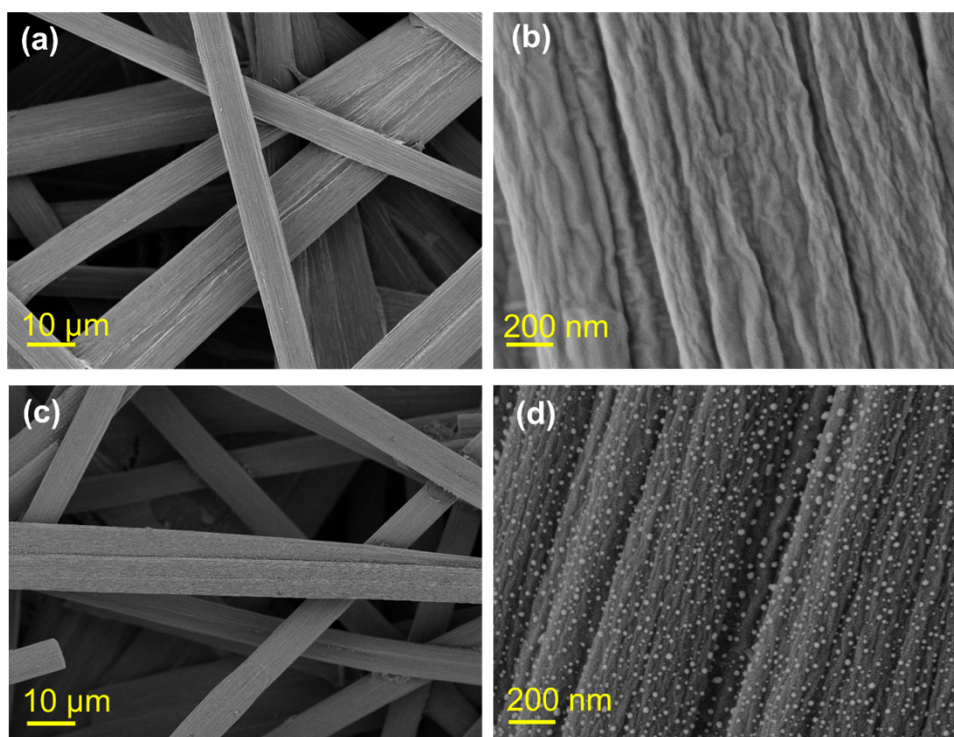

**Figure S1.** (a and b) SEM image of CP surface; (c and d) distribution of Ni NPs on CP surface.

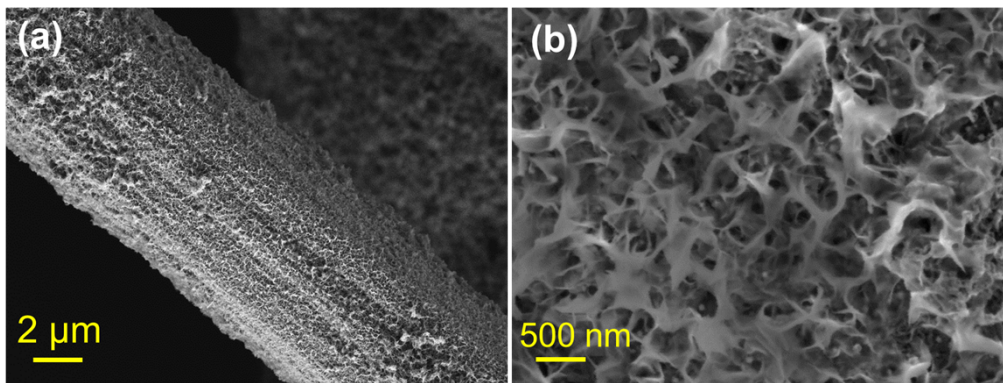

**Figure S2.** (a and b) SEM images of Fe-doped NiSe NSs on CP at different magnifications.

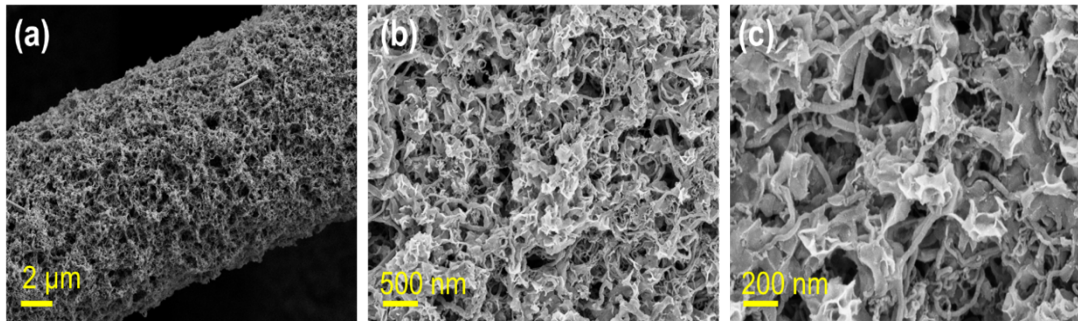

**Figure S3.** (a-c) SEM images of NiSe NSs/CNTs at different magnifications.

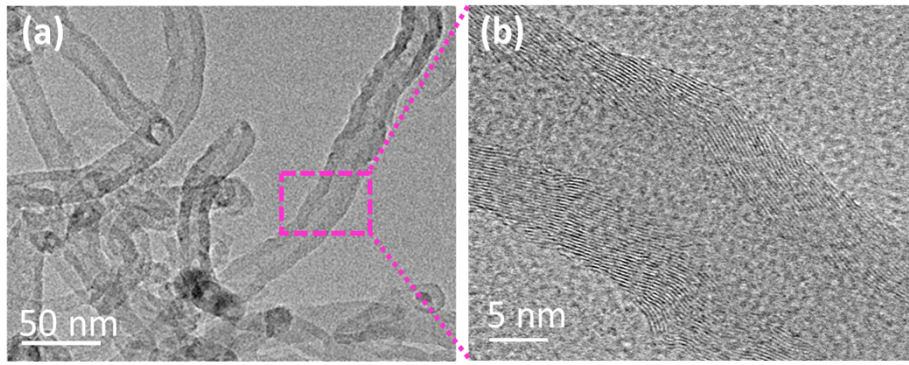

**Figure S4.** (a) TEM and (b) HR-TEM images of CNTs grown on CP.

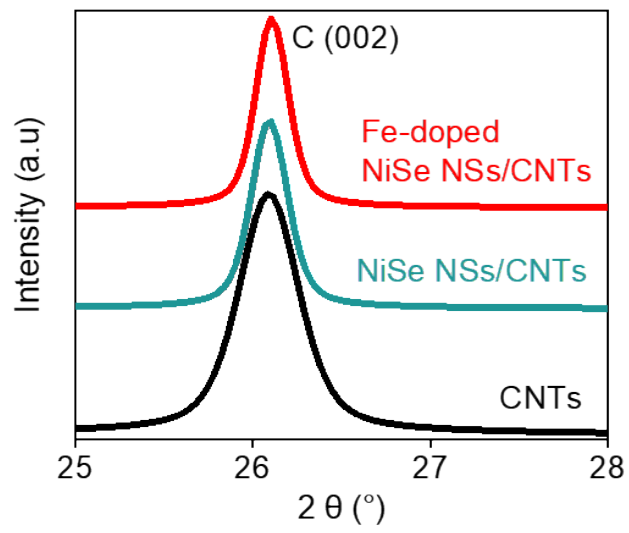

**Figure S5.** Magnified XRD spectra of CNTs, NiSe NSs/CNTs and Fe-doped NiSe NSs/CNTs on CP

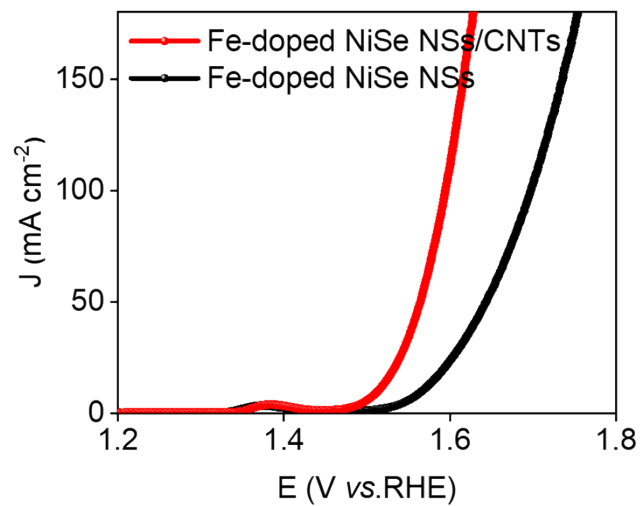

**Figure S6.** Comparison of OER activities between Fe-doped NiSe NSs/CNTs and Fe-doped NiSe NSs.

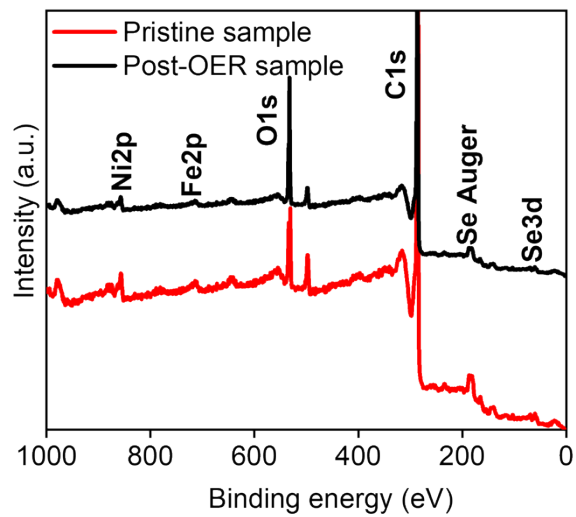

**Figure S7.** Comparison of XPS survey spectra between the pristine and post-OER Fe-doped NiSe NSs/CNTs.

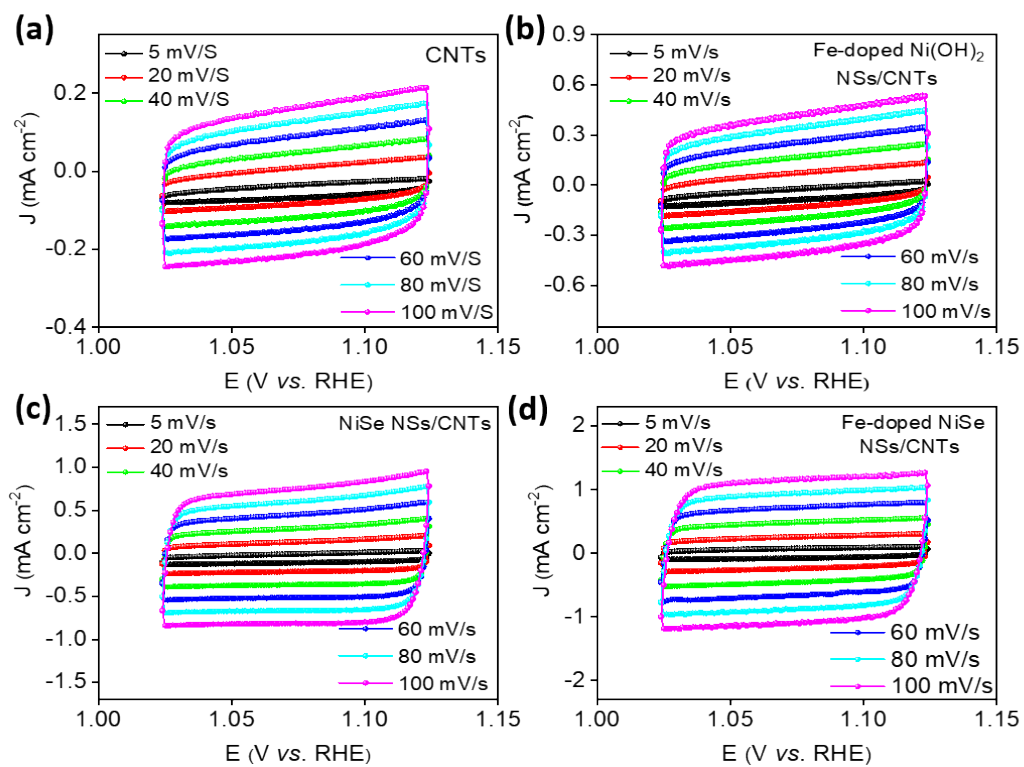

**Figure S8.** Typical CV curves of (a) CNTs, (b) Fe-doped Ni(OH)<sub>2</sub> NSs/CNTs, (c) NiSe NSs/CNTs, and (d) Fe-doped NiSe NSs/CNTs at different scan rates in 1.0 M KOH.



## Turnover frequency (TOF) calculations

The calculation of TOF was referred from a method reported by Wang et al.<sup>1</sup> In a specific procedure, CV curves were initially measured at 50 mV s<sup>-1</sup> in PBS solution (pH = 7.0). Then the absolute components of the voltammetric charges (cathodic and anodic) reported during a single measurement was added. The quantity of active species (*n*) is calculated according to Equation S1.

$$n = \frac{Q}{2F} = \frac{It}{2F} = \frac{IV}{2Fv} \quad (\text{S1})$$

where *Q* is the voltammetric charge, *F* is the Faraday constant (C mol<sup>-1</sup>), *I* is the current (A), *t* is the time (s), *V* is the voltage (V) and *v* is the scanning rate (V s<sup>-1</sup>).

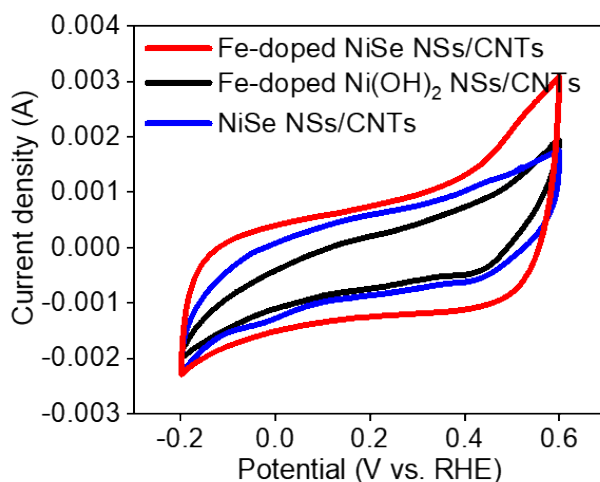

**Figure S9.** CV curves of Fe-doped NiSe NSs/CNTs, NiSe NSs/CNTs and Fe-doped Ni(OH)<sub>2</sub> NSs/CNTs in PBS solution (pH = 7.0) at a scan rate of 50 mV s<sup>-1</sup>.

The active site number of Fe-doped NiSe NSs/CNTs, NiSe NSs/CNTs and Fe-doped Ni(OH)<sub>2</sub> NSs/CNTs are calculated to be 1.7448259e-7, 1.12361414e-7, and 6.96084676e-8 mol, respectively. Therefore, the TOF can be calculated by Equation S2:

$$TOF = \frac{|j| A}{nmF} \quad (S2)$$

*j*: Current (A) during the linear sweep voltammetry (LSV) tests.

*A*: The area of the electrode (1 cm<sup>2</sup>)

*F*: Faraday constant (96485 C mol<sup>-1</sup>).

*n*: Number of active sites (mol).

*m*: The factor 1/*m* represents that *m* electrons are required to form one H<sub>2</sub>/O<sub>2</sub> molecule from water, which means that the *m* values for hydrogen evolution and oxygen evolution reactions are 2 and 4, respectively.

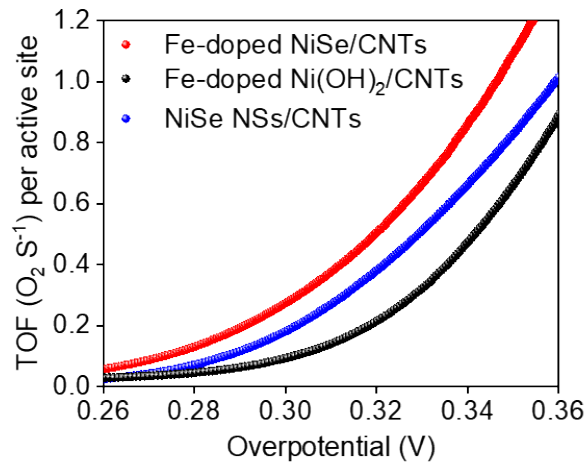

**Figure S10.** Calculated O<sub>2</sub> TOF values of Fe-doped NiSe NSs/CNTs, NiSe NSs/CNTs, and Fe-doped Ni(OH)<sub>2</sub> NSs/CNTs.

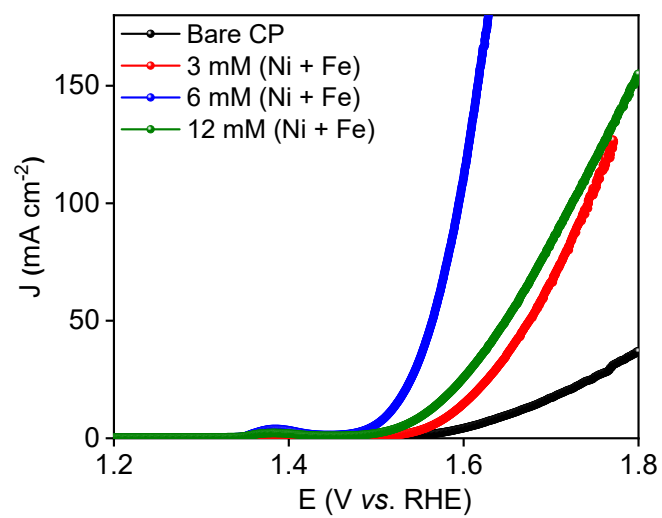

**Figure S11.** OER performance of the Fe-doped NiSe NSs/CNTs on CP derived from different total concentrations of (Ni + Fe) precursors.

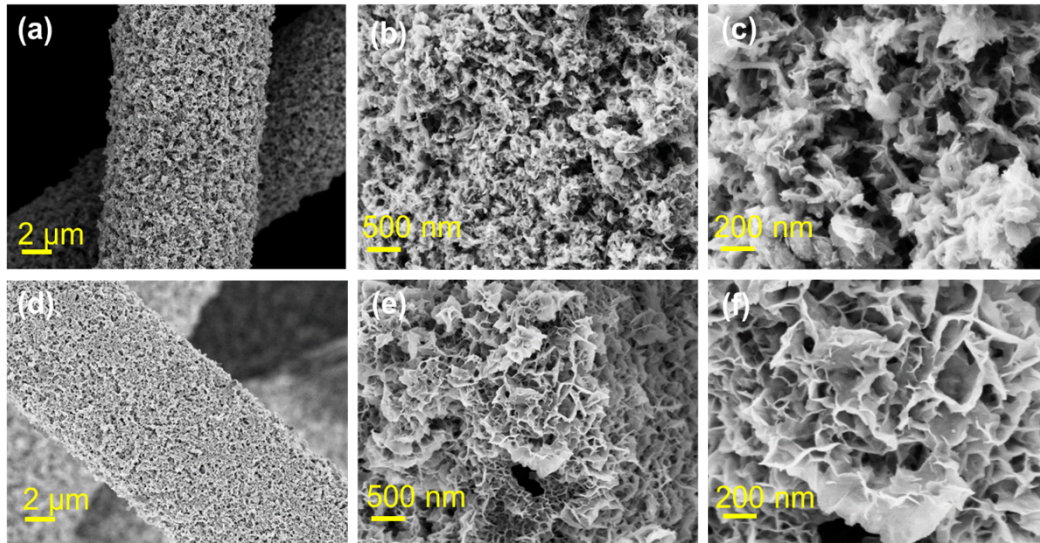

**Figure S12.** SEM images of the Fe-doped NiSe NSs/CNTs materials derived from different total (Ni + Fe) precursors: (a-c) 3.0 mM, and (d-f) 12.0 mM.

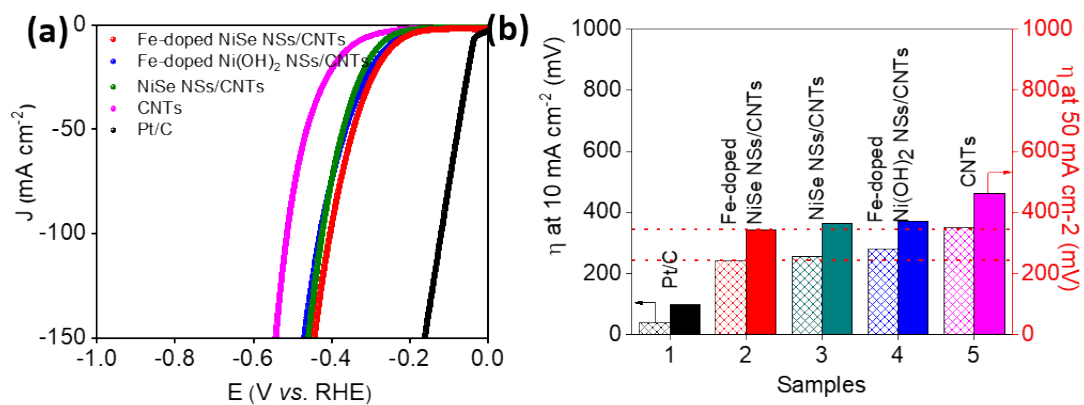

**Figure S13.** (a) iR-corrected LSV curves of materials towards HER in 1.0 M KOH medium; (b)

A comparison of  $\eta$  value at 10 mA cm<sup>-2</sup> between materials.

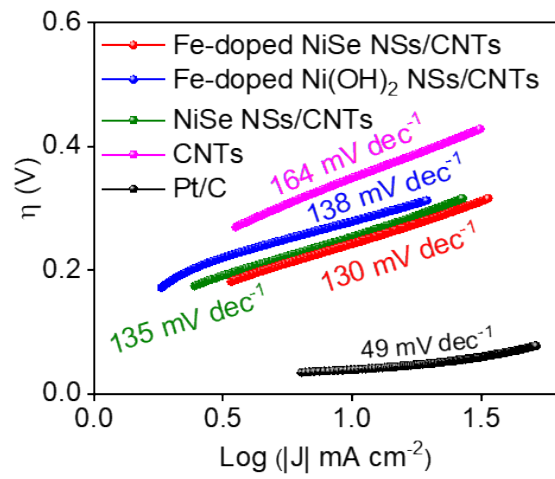

**Figure S14.** Tafel slope values of materials towards HER in 1.0 M KOH medium.

**Table S1.** Comparison of O<sub>2</sub> TOF between the Fe-doped NiSe NSs/CNTs with recently reported electrocatalysts.

| <b>Catalysts</b>                            | <b>O<sub>2</sub> TOF<br/>at <math>\eta_{350\text{ mV}}</math> (s<sup>-1</sup>)</b> | <b>References</b>                               |
|---------------------------------------------|------------------------------------------------------------------------------------|-------------------------------------------------|
| <b>Fe-doped NiSe<br/>NSs/CNTs</b>           | <b>1.097</b>                                                                       | <b>This work</b>                                |
| CoO@NiFe LDH/NF                             | 0.59                                                                               | <i>Chem. Eng. J.</i> , 2021, 410, 128366        |
| FeNi <sub>3</sub> @NC                       | 0.149                                                                              | <i>Appl. Catal. B.</i> , 2020, 268, 118729      |
| Ni-doped FeF <sub>2</sub>                   | 0.05                                                                               | <i>Chem. Commun.</i> , 2020, 56, 7889           |
| Ni <sub>2.2</sub> Fe(OH) <sub>x</sub> HNAs  | 0.15                                                                               | <i>Sci. Rep.</i> , 2017, 7, 46154               |
| FeP/Ni <sub>2</sub> P@CNT                   | 0.979                                                                              | <i>J. Alloys Compd.</i> , 2021, 883, 160926     |
| Ni-MOF/NF                                   | 0.24                                                                               | <i>Inorg. Chem. Front.</i> , 2021, 8, 3007-3011 |
| Co-Fe-S NFs@MS/NF                           | 0.441                                                                              | <i>Electrochim. Acta</i> , 2020, 361, 137038    |
| NiFe LDH-Ci/CC                              | 0.59                                                                               | <i>Chem. Eng. J.</i> , 2021, 410, 128366        |
| Vo-(Co, Fe) <sub>3</sub> O <sub>4</sub> /CC | 0.43                                                                               | <i>Appl. Surf. Sci.</i> , 2020, 529, 147125     |

## References

1. P. Wang, R. Qin, P. Ji, Z. Pu, J. Zhu, C. Lin, Y. Zhao, H. Tang, W. Li, S. Mu , *Small*, 2020, **16**, 2001642
